# Supplementary material for: Defucosylated Mouse–Dog Chimeric Anti-EGFR Antibody Exerts Antitumor Activities in Mouse Xenograft Models of Canine Tumors
Source: MDPI journal article supplement (doi:10.3390/cells10123599), 2021-12-20
Supplement: s1 [file s1]

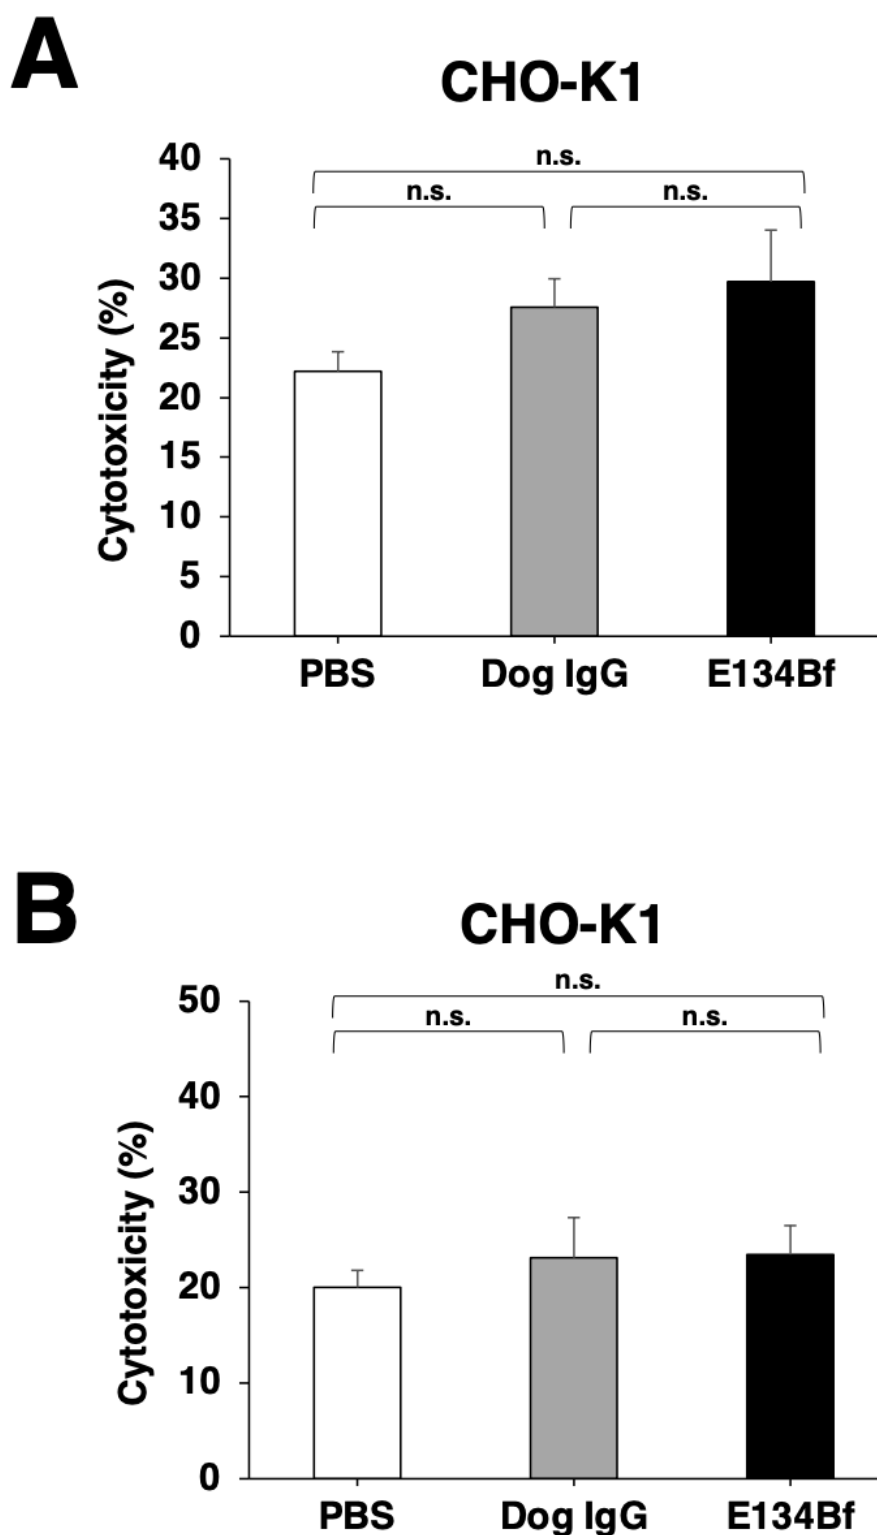

**Supplementary Figure S1.** Evaluation of ADCC and CDC by E134Bf against CHO-K1, EGFR-negative cells elicited. (A) ADCC elicited by E134Bf, control dog IgG, or control PBS targeting CHO-K1 cells. (B) CDC elicited by E134Bf, control dog IgG, or control PBS targeting CHO-K1 cells. The values are expressed as mean  $\pm$  SEM. Asterisks indicate statistical

significance (n.s., not significant; Tukey's *post hoc* test). ADCC, antibody-dependent cellular cytotoxicity; CDC, complement-dependent cytotoxicity.

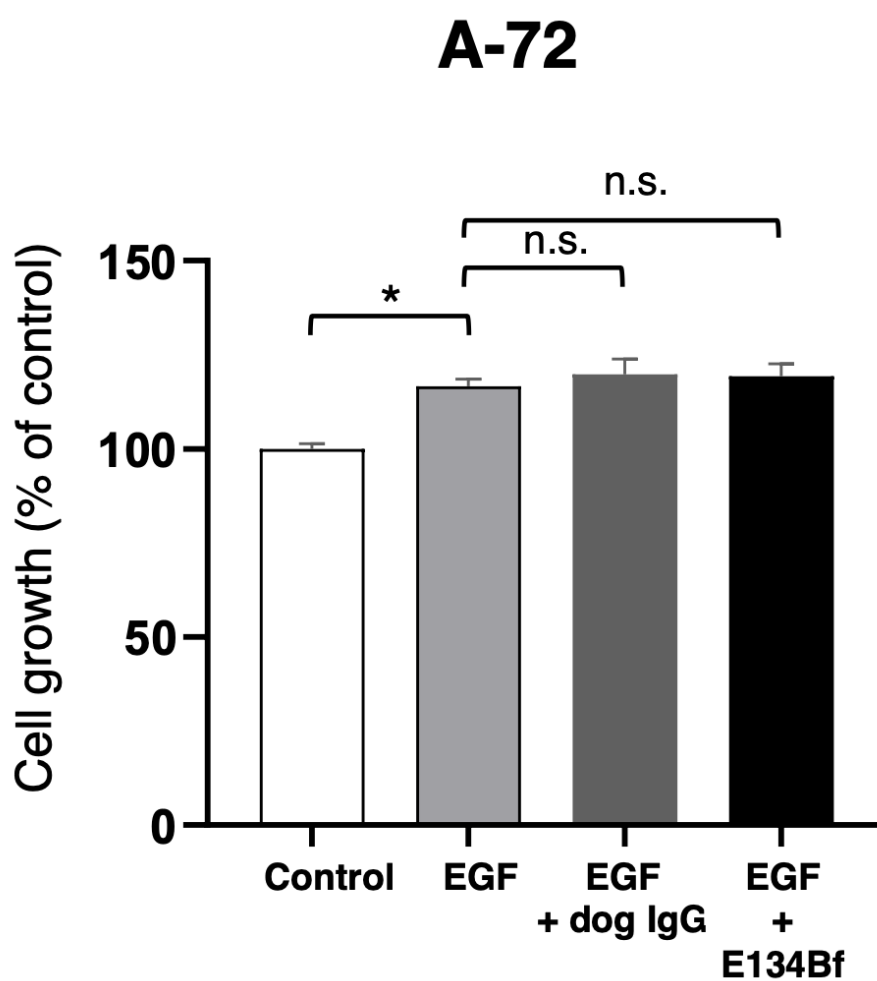

**Supplementary Figure S2.** E134Bf did not inhibit the cell growth of A-72 stimulated by EGF. A-72 cells were treated for 36 h with or without 1 ng/mL canine EGF or canine EGF + indicated IgGs (20 µg/mL). Cell growth was determined

using the MTS assay. The values are expressed as mean  $\pm$  SEM. Asterisks indicate statistical significance ( $^*P < 0.05$ , n.s., not significant; Tukey's *post hoc* test).

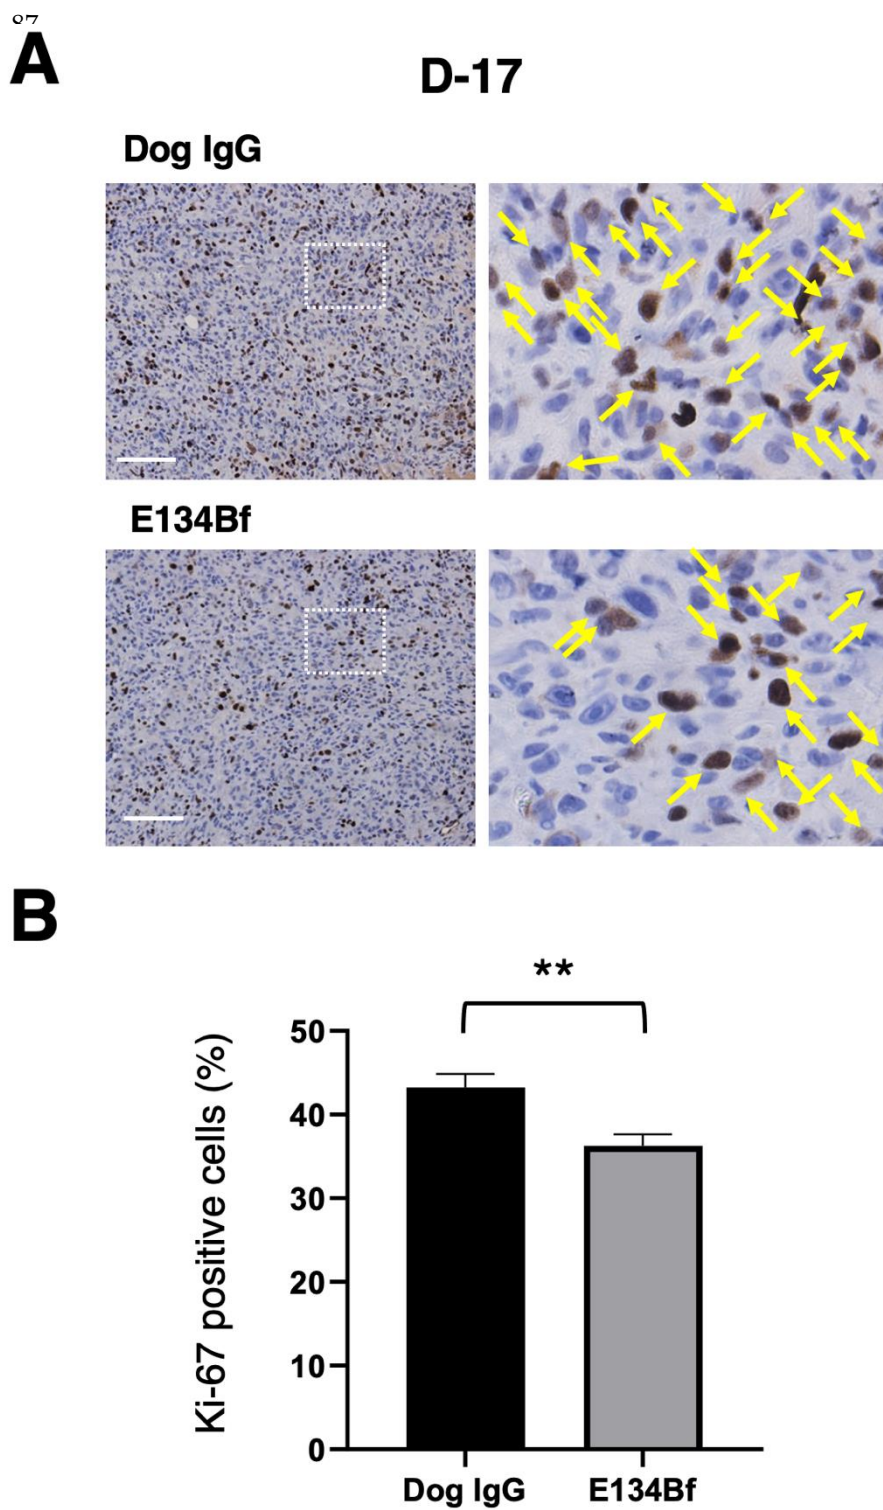

**Supplementary Figure S3.** Ki-67 staining in the xenograft tumor tissues. (A) The expression of Ki-67 in the tumor tissue was detected *via* immunohistochemistry. The arrows indicate Ki-67-positive cells. Scale bar, 100  $\mu$ m. (B) Quantification

---

of Ki-67-positive cells. Five random fields were selected from within each section. The values are expressed as mean  $\pm$  SEM. Asterisk indicates statistical significance ( $**P < 0.01$ , Welch's test).
